# Supplementary material
Source: PubMed Central journal article supplement (PMC3234774)
Supplement: supp_M111.258921_jbc.M111.258921-1.pdf [file supp_M111.258921_jbc.M111.258921-1.pdf]

## Supplementary Experimental Procedure

| Primer         | Sequence                                    | Enzyme  |
|----------------|---------------------------------------------|---------|
| hCHEM-5 Ngo    | 5'- <u>AGCCGGCC</u> ACCATGCGACGGCTGCTGAT    | NgoMI V |
| hCHEM-3 Nhe-FL | 5'- <u>AGCTAGCT</u> TAGCTGCGGGGCAGGGGCTT    | Nhe I   |
| hCHEM-3 Nhe-K  | 5'- <u>AGCTAGCT</u> TACTTGGAGAAGGCGAACTGTCC | Nhe I   |
| hCHEM-3 Nhe-S  | 5'- <u>AGCTAGCT</u> TAGGAGAAGGCGAACTGTCCAG  | Nhe I   |
| hCHEM-3 Nhe-F  | 5'- <u>AGCTAGCT</u> TAGAAGGCGAACTGTCCAGGGA  | Nhe I   |
| hCHEM-3 Nhe-A  | 5'- <u>AGCTAGCT</u> TAGGCGAACTGTCCAGGGAAGT  | Nhe I   |

hCHEM-5 Ngo was used as sense primer, and hCHEM-3 Nhe-K for chem158K, hCHEM-3 Nhe-S (chem157S), hCHEM-3 Nhe-F (chem156F) and hCHEM-3 Nhe-A (chem155A) were as anti-sense primers, in which the underlined nucleotides are restriction enzyme site described in the right column.
